# Supplementary material for: Tumor Burden and Health-Related Quality of Life in Patients with Melanoma In-Transit Metastases
Source: MDPI journal article supplement (doi:10.3390/cancers15010161), 2022-12-27
Supplement: s1 [file s1]

## Supplementary Materials:

**Table S1.** Multiple and hierarchical ordinary least squares (OLS) regression showing the total FACT-M score regressed on patient characteristics (sex, age) in Step 1, and tumor burden (number of tumors, tumor size, localization, lymph node metastasis) in Step 2.

|                                                           | Step 1 |          |       |      |                                                           | Step 2 |          |       |      |      |
|-----------------------------------------------------------|--------|----------|-------|------|-----------------------------------------------------------|--------|----------|-------|------|------|
|                                                           | B      | [95% CI] |       | Beta | p                                                         | B      | [95% CI] |       | Beta | p    |
|                                                           |        | LL       | UL    |      |                                                           |        | LL       | UL    |      |      |
|                                                           |        |          |       |      |                                                           |        |          |       |      |      |
| Sex <sup>a</sup>                                          | 8.42   | -27      | 17.11 | .21  | .057                                                      | 11.64  | 2.91     | 20.36 | .28  | .010 |
| Age                                                       | .26    | -.12     | -.64  | .15  | .179                                                      | .25    | -.14     | .64   | .14  | .199 |
| Number                                                    |        |          |       |      |                                                           | -.40   | -.64     | -.17  | -.37 | .001 |
| Size                                                      |        |          |       |      |                                                           | -.15   | -.35     | .06   | -.15 | .164 |
| Localization <sup>b</sup>                                 |        |          |       |      |                                                           | 6.99   | -6.28    | 20.26 | .11  | .297 |
| Metastasis <sup>c</sup>                                   |        |          |       |      |                                                           | .94    | -8.01    | 9.89  | .02  | .835 |
| F(2, 81)=2.78, <i>p</i> =.068; <i>R</i> <sup>2</sup> =.04 |        |          |       |      | F(6, 71)=3.38, <i>p</i> =.005; <i>R</i> <sup>2</sup> =.16 |        |          |       |      |      |

<sup>a</sup>Female vs. male

<sup>b</sup>Leg vs. arm

<sup>c</sup>No vs. Yes

**Table S2.** Multiple and hierarchical ordinary least squares (OLS) regression showing the FACT-M subscale FACT-G score regressed on patient characteristics (sex, age) in Step 1, and tumor burden (number of tumors, tumor size, localization, and lymph node metastasis) in Step 2.

|                                                           | Step 1 |          |       |      |                                                           | Step 2 |          |       |      |      |
|-----------------------------------------------------------|--------|----------|-------|------|-----------------------------------------------------------|--------|----------|-------|------|------|
|                                                           | B      | [95% CI] |       | Beta | p                                                         | B      | [95% CI] |       | Beta | p    |
|                                                           |        | LL       | UL    |      |                                                           |        | LL       | UL    |      |      |
|                                                           |        |          |       |      |                                                           |        |          |       |      |      |
| Sex <sup>a</sup>                                          | 4.44   | -1.31    | 10.19 | .16  | .128                                                      | 6.69   | .57      | 12.82 | .24  | .033 |
| Age                                                       | .10    | -.16     | .36   | .08  | .463                                                      | .07    | -.21     | .34   | .06  | .612 |
| Number                                                    |        |          |       |      |                                                           | -.22   | -.39     | -.05  | -.29 | .010 |
| Size                                                      |        |          |       |      |                                                           | -.11   | -.25     | .04   | -.16 | .159 |
| Localization <sup>b</sup>                                 |        |          |       |      |                                                           | 3.93   | -5.56    | 13.43 | .09  | .412 |
| Metastasis <sup>c</sup>                                   |        |          |       |      |                                                           | .04    | -6.30    | 6.38  | .00  | .990 |
| F(2, 88)=1.42, <i>p</i> =.247; <i>R</i> <sup>2</sup> =.01 |        |          |       |      | F(6, 75)=2.09, <i>p</i> =.064; <i>R</i> <sup>2</sup> =.07 |        |          |       |      |      |

<sup>a</sup>Female vs. male

<sup>b</sup>Leg vs. arm

<sup>c</sup>No vs. Yes

**Table S3.** Multiple and hierarchical ordinary least squares (OLS) regression showing the FACT-M subscale PWB score regressed on patient characteristics (sex, age) in Step 1, and tumor burden (number of tumors, tumor size, localization, and lymph node metastasis) in Step 2.

|                                                           | Step 1 |          |      |      |                                                            | Step 2 |          |      |      |      |
|-----------------------------------------------------------|--------|----------|------|------|------------------------------------------------------------|--------|----------|------|------|------|
|                                                           | B      | [95% CI] |      | Beta | p                                                          | B      | [95% CI] |      | Beta | p    |
|                                                           |        | LL       | UL   |      |                                                            |        | LL       | UL   |      |      |
|                                                           |        |          |      |      |                                                            |        |          |      |      |      |
| Sex <sup>a</sup>                                          | 1.66   | .13      | 3.19 | .22  | .034                                                       | 2.40   | .91      | 3.90 | .31  | .002 |
| Age                                                       | .06    | -.01     | .13  | .18  | .074                                                       | .06    | -.01     | .12  | .16  | .098 |
| Number                                                    |        |          |      |      |                                                            | -.08   | -.12     | -.04 | -.36 | .000 |
| Size                                                      |        |          |      |      |                                                            | -.05   | -.09     | -.01 | -.27 | .009 |
| Localization <sup>b</sup>                                 |        |          |      |      |                                                            | .90    | -1.38    | 3.17 | .08  | .434 |
| Metastasis <sup>c</sup>                                   |        |          |      |      |                                                            | .54    | -1.01    | 2.10 | .07  | .489 |
| F(2, 91)=3.96, <i>p</i> =.022; <i>R</i> <sup>2</sup> =.06 |        |          |      |      | F(6, 78)=5.06, <i>p</i> < .001; <i>R</i> <sup>2</sup> =.22 |        |          |      |      |      |

<sup>a</sup>Female vs. male

<sup>b</sup>Leg vs. arm

<sup>c</sup>No vs. Yes

**Table S4.** Multiple and hierarchical ordinary least squares (OLS) regression showing the FACT-M subscale SWB score regressed on patient characteristics (sex, age) in Step 1, and tumor burden (number of tumors, tumor size, localization, and lymph node metastasis) in Step 2.

|                                                           | Step 1 |          |      |      | Step 2                                                    |          |      |      |
|-----------------------------------------------------------|--------|----------|------|------|-----------------------------------------------------------|----------|------|------|
|                                                           | B      | [95% CI] |      | p    | B                                                         | [95% CI] |      | p    |
|                                                           |        | LL       | UL   |      |                                                           | LL       | UL   |      |
| Sex <sup>a</sup>                                          | .03    | -1.90    | 1.97 | .972 | -.27                                                      | -2.46    | 1.93 | .809 |
| Age                                                       | .01    | -.08     | .10  | .829 | -.00                                                      | -.10     | .10  | .961 |
| Number                                                    |        |          |      |      | .01                                                       | -.05     | .07  | .642 |
| Size                                                      |        |          |      |      | -.01                                                      | -.06     | .05  | .822 |
| Localization <sup>b</sup>                                 |        |          |      |      | .46                                                       | -2.87    | 3.78 | .786 |
| Metastasis <sup>c</sup>                                   |        |          |      |      | .55                                                       | -1.73    | 2.82 | .633 |
| F(2, 90)=0.02, <i>p</i> =.976; <i>R</i> <sup>2</sup> =.00 |        |          |      |      | F(6, 77)=0.11, <i>p</i> =.995; <i>R</i> <sup>2</sup> =.00 |          |      |      |

<sup>a</sup>Female vs. male

<sup>b</sup>Leg vs. arm

<sup>c</sup>No vs. Yes

**Table S5.** Multiple and hierarchical ordinary least squares (OLS) regression showing the FACT-M subscale EWB score regressed on patient characteristics (sex, age) in Step 1, and tumor burden (number of tumors, tumor size, localization, and lymph node metastasis) in Step 2.

|                                                           | Step 1 |          |      |      |                                                           | Step 2 |          |      |      |      |
|-----------------------------------------------------------|--------|----------|------|------|-----------------------------------------------------------|--------|----------|------|------|------|
|                                                           | B      | [95% CI] |      | Beta | p                                                         | B      | [95% CI] |      | Beta | p    |
|                                                           |        | LL       | UL   |      |                                                           |        | LL       | UL   |      |      |
|                                                           |        |          |      |      |                                                           |        |          |      |      |      |
| Sex <sup>a</sup>                                          | 1.92   | .12      | 3.73 | .22  | .037                                                      | 2.56   | .73      | 4.39 | .29  | .007 |
| Age                                                       | .04    | -.04     | .12  | .10  | .313                                                      | .03    | -.05     | .11  | .07  | .498 |
| Number                                                    |        |          |      |      |                                                           | -.06   | -.11     | -.01 | -.23 | .029 |
| Size                                                      |        |          |      |      |                                                           | -.02   | -.06     | .03  | -.09 | .425 |
| Localization <sup>b</sup>                                 |        |          |      |      |                                                           | 1.91   | -.99     | 4.81 | .14  | .194 |
| Metastasis <sup>c</sup>                                   |        |          |      |      |                                                           | -1.39  | -3.28    | .51  | -.15 | .149 |
| F(2, 91)=2.71, <i>p</i> =.072; <i>R</i> <sup>2</sup> =.04 |        |          |      |      | F(6, 78)=2.87, <i>p</i> =.014; <i>R</i> <sup>2</sup> =.12 |        |          |      |      |      |

<sup>a</sup>Female vs. male

<sup>b</sup>Leg vs. arm

<sup>c</sup>No vs. Yes

**Table S6.** Multiple and hierarchical ordinary least squares (OLS) regression showing the FACT-M subscale FWB score regressed on patient characteristics (sex, age) in Step 1, and tumor burden (number of tumors, tumor size, localization, and lymph node metastasis) in Step 2.

|                           | Step 1 |          |      |      |      | Step 2 |          |      |      |      |
|---------------------------|--------|----------|------|------|------|--------|----------|------|------|------|
|                           | B      | [95% CI] |      | Beta | p    | B      | [95% CI] |      | Beta | p    |
|                           |        | LL       | UL   |      |      |        | LL       | UL   |      |      |
|                           |        |          |      |      |      |        |          |      |      |      |
| Sex <sup>a</sup>          | 1.37   | -1.01    | 3.75 | .12  | .256 | 2.26   | -.22     | 4.74 | .19  | .074 |
| Age                       | -.03   | -.14     | .07  | -.06 | .547 | -.03   | -.14     | .08  | -.06 | .594 |
| Number                    |        |          |      |      |      | -.12   | -.19     | -.05 | -.36 | .001 |
| Size                      |        |          |      |      |      | -.03   | -.09     | .03  | -.11 | .295 |
| Localization <sup>b</sup> |        |          |      |      |      | .84    | -3.11    | 4.78 | .05  | .674 |
| Metastasis <sup>c</sup>   |        |          |      |      |      | .02    | -2.55    | 2.60 | .00  | .986 |

|                              |                                     |                                     |
|------------------------------|-------------------------------------|-------------------------------------|
|                              | F(2, 91)=0,85, $p=.430$ ; $R^2=.00$ | F(6, 78)=2,61, $p=.023$ ; $R^2=.10$ |
| <sup>a</sup> Female vs. male |                                     |                                     |
| <sup>b</sup> Leg vs. arm     |                                     |                                     |
| <sup>c</sup> No vs. Yes      |                                     |                                     |

**Table S7.** Multiple and hierarchical ordinary least squares (OLS) regression showing the FACT-M subscale MS score regressed on patient characteristics (sex, age) in Step 1, and tumor burden (number of tumors, tumor size, localization, and lymph node metastasis) in Step 2.

|                           | Step 1                              |          |      |      |      | Step 2                                |          |      |      |      |
|---------------------------|-------------------------------------|----------|------|------|------|---------------------------------------|----------|------|------|------|
|                           | B                                   | [95% CI] |      | Beta | p    | B                                     | [95% CI] |      | Beta | p    |
|                           |                                     | LL       | UL   |      |      |                                       | LL       | UL   |      |      |
| Sex <sup>a</sup>          | 2.23                                | -.80     | 5.25 | .15  | .147 | 3.80                                  | .78      | 6.83 | .25  | .014 |
| Age                       | .14                                 | .00      | .28  | .21  | .043 | .16                                   | .02      | .30  | .23  | .023 |
| Number                    |                                     |          |      |      |      | -.17                                  | -.25     | -.08 | -.40 | .000 |
| Size                      |                                     |          |      |      |      | -.04                                  | -.11     | .04  | -.10 | .316 |
| Localization <sup>b</sup> |                                     |          |      |      |      | 2.04                                  | -2.60    | 6.68 | .09  | .384 |
| Metastasis <sup>c</sup>   |                                     |          |      |      |      | .49                                   | -2.65    | 3.64 | .03  | .757 |
|                           | F(2, 92)=3,13, $p=.048$ ; $R^2=.04$ |          |      |      |      | F(6, 79)=4,37, $p < .001$ ; $R^2=.19$ |          |      |      |      |

<sup>a</sup>Female vs. male

<sup>b</sup>Leg vs. arm

<sup>c</sup>No vs. Yes

**Table S8.** Multiple and hierarchical ordinary least squares (OLS) regression showing the FACT-M subscale MSS score regressed on patient characteristics (sex, age) in Step 1, and tumor burden (number of tumors, tumor size, localization, and lymph node metastasis) in Step 2.

|                           | Step 1                                |          |      |      |      | Step 2                                |          |      |      |      |
|---------------------------|---------------------------------------|----------|------|------|------|---------------------------------------|----------|------|------|------|
|                           | B                                     | [95% CI] |      | Beta | p    | B                                     | [95% CI] |      | Beta | p    |
|                           |                                       | LL       | UL   |      |      |                                       | LL       | UL   |      |      |
| Sex <sup>a</sup>          | 1.92                                  | -.76     | 4.60 | .14  | .158 | 2.87                                  | .35      | 5.39 | .22  | .026 |
| Age                       | .22                                   | .11      | .34  | .38  | .000 | .25                                   | .14      | .37  | .43  | .000 |
| Number                    |                                       |          |      |      |      | -.09                                  | -.15     | -.02 | -.24 | .016 |
| Size                      |                                       |          |      |      |      | -.06                                  | -.12     | .00  | -.18 | .070 |
| Localization <sup>b</sup> |                                       |          |      |      |      | 2.38                                  | -1.35    | 6.11 | .12  | .207 |
| Metastasis <sup>c</sup>   |                                       |          |      |      |      | -1.98                                 | -4.59    | .63  | -.14 | .134 |
|                           | F(2, 83)=8,35, $p < .001$ ; $R^2=.15$ |          |      |      |      | F(6, 73)=6,74, $p < .001$ ; $R^2=.30$ |          |      |      |      |

<sup>a</sup>Female vs. male

<sup>b</sup>Leg vs. arm

<sup>c</sup>No vs. Yes
